# Supplementary material for: Isolation and structural characterization of the most highly trifluoromethylated C70fullerenes: C70(CF3)18and C70(CF3)20
Source: Royal Society of Chemistry journal article supplement (doi:10.1039/c2nj40959c), 2012-11-29
Supplement: c2nj40959c.pdf [file c2nj40959c.pdf]

Supporting information for

**Isolation and structural characterization of the most highly trifluoromethylated fullerene,  $C_{70}(CF_3)_{20}$**

Daria V. Ignat'eva, Alexey A. Goryunkov, Nadezhda B. Tamm, Ilya N. Ioffe, Lev N. Sidorov and Sergey I. Troyanov\*

**Table 1.** The Schlegel diagrams, relative energies (at the DFT and AM1 levels of theory), and IUPAC lowest-locant abbreviations for the most stable isomers of  $C_{70}(CF_3)_{18}$  within the gap of 40  $\text{kJ mol}^{-1}$  (the fields with experimentally observed isomers are shadowed).

| <i>N</i> | Schlegel Diagram of $C_{70}(CF_3)_{18}$                                             | $\Delta_f H_0^\circ$<br>$\text{kJ mol}^{-1}$ |      | IUPAC lowest-locant abbreviation for octadeca(trifluoromethyl)( $C_{70}$ - $D_{5h(6)}$ )[5,6]fullerene |
|----------|-------------------------------------------------------------------------------------|----------------------------------------------|------|--------------------------------------------------------------------------------------------------------|
|          |                                                                                     | DFT                                          | AM1  |                                                                                                        |
| 1        | 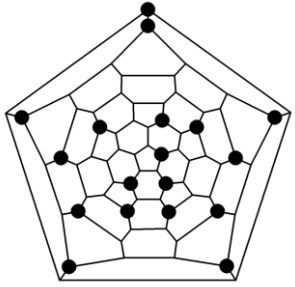  | 0.0                                          | 0.0  | 1, 4, 8, 11, 16, 19, 23, 27, 31, 34, 37, 41, 44, 46, 47, 52, 60, 69                                    |
| 2        |  | 3.4                                          | 22.9 | 1, 4, 8, 11, 16, 19, 23, 26, 31, 34, 37, 41, 44, 47, 48, 52, 60, 69                                    |
| 3        |  | 7.9                                          | 20.2 | 1, 4, 8, 11, 16, 19, 23, 26, 31, 37, 41, 44, 47, 48, 55, 60, 67, 69                                    |

| <i>N<sub>0</sub></i> | Schlegel Diagram of<br><i>C</i> <sub>70</sub> ( <i>CF</i> <sub>3</sub> ) <sub>18</sub> | $\Delta_f H_0^\circ$<br>kJ mol <sup>-1</sup> |      | IUPAC lowest-locant abbreviation for<br>octadeca(trifluoromethyl)( <i>C</i> <sub>70</sub> - <i>D</i> <sub>5h(6)</sub> )[5,6]fullerene |
|----------------------|----------------------------------------------------------------------------------------|----------------------------------------------|------|---------------------------------------------------------------------------------------------------------------------------------------|
|                      |                                                                                        | DFT                                          | AMI  |                                                                                                                                       |
| 4                    | 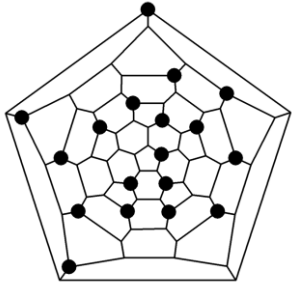      | 9.8                                          | 10.0 | 1, 4, 7, 11, 18, 21, 24, 31, 33, 35, 39, 44, 47, 51, 53, 58, 61, 64                                                                   |
| 5                    |      | 11.1                                         | 17.6 | 1, 4, 8, 11, 16, 19, 23, 26, 31, 34, 37, 41, 45, 48, 52, 60, 63, 69                                                                   |
| 6                    |     | 23.0                                         | 35.5 | 1, 4, 8, 11, 16, 19, 23, 24, 27, 31, 37, 44, 47, 51, 55, 58, 61, 64                                                                   |
| 7                    |     | 27.0                                         | 6.9  | 1, 4, 8, 11, 16, 19, 24, 27, 31, 37, 41, 43, 46, 51, 53, 56, 62, 64                                                                   |

| <i>N</i> <sub>0</sub> | Schlegel Diagram of<br><i>C</i> <sub>70</sub> ( <i>CF</i> <sub>3</sub> ) <sub>18</sub> | $\Delta_f H_0^\circ$<br>kJ mol <sup>-1</sup> |      | IUPAC lowest-locant abbreviation for<br>octadeca(trifluoromethyl)( <i>C</i> <sub>70</sub> - <i>D</i> <sub>5h(6)</sub> )[5,6]fullerene |
|-----------------------|----------------------------------------------------------------------------------------|----------------------------------------------|------|---------------------------------------------------------------------------------------------------------------------------------------|
|                       |                                                                                        | DFT                                          | AMI  |                                                                                                                                       |
| 8                     | 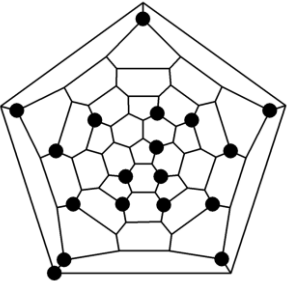      | 27.4                                         | 20.5 | 1, 4, 8, 11, 16, 19, 23, 24, 27, 31, 34, 37, 41, 44, 47, 52, 60, 69                                                                   |
| 9                     |      | 27.6                                         | 31.1 | 1, 4, 8, 11, 16, 19, 23, 27, 31, 37, 41, 44, 46, 51, 53, 56, 62, 64                                                                   |
| 10                    |     | 27.6                                         | 15.0 | 1, 4, 8, 11, 16, 19, 23, 26, 31, 34, 37, 41, 48, 52, 55, 60, 67, 69                                                                   |
| 11                    |     | 27.7                                         | 5.8  | 1, 4, 8, 11, 18, 23, 24, 27, 31, 35, 38, 44, 47, 51, 55, 58, 61, 64                                                                   |

| <i>N<sub>0</sub></i> | Schlegel Diagram of<br><i>C</i> <sub>70</sub> ( <i>CF</i> <sub>3</sub> ) <sub>18</sub> | $\Delta_f H_0^\circ$<br>kJ mol <sup>-1</sup> |      | IUPAC lowest-locant abbreviation for<br>octadeca(trifluoromethyl)( <i>C</i> <sub>70</sub> - <i>D</i> <sub>5h(6)</sub> )[5,6]fullerene |
|----------------------|----------------------------------------------------------------------------------------|----------------------------------------------|------|---------------------------------------------------------------------------------------------------------------------------------------|
|                      |                                                                                        | DFT                                          | AMI  |                                                                                                                                       |
| 12                   | 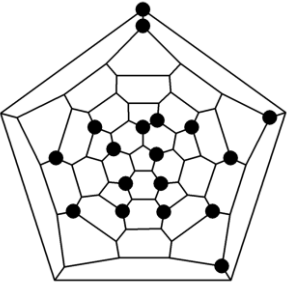      | 27.8                                         | 42.6 | 1, 4, 8, 11, 16, 19, 24, 27, 31, 37, 41, 43, 44, 47, 51, 55, 56, 64                                                                   |
| 13                   |      | 28.0                                         | 21.1 | 1, 4, 8, 11, 16, 19, 24, 27, 31, 37, 41, 43, 46, 51, 55, 56, 62, 64                                                                   |
| 14                   |     | 28.8                                         | 22.9 | 1, 4, 8, 11, 16, 19, 23, 26, 27, 31, 34, 37, 41, 44, 47, 52, 60, 69                                                                   |
| 15                   |     | 29.4                                         | 46.5 | 1, 4, 7, 11, 18, 23, 24, 31, 33, 35, 39, 44, 47, 51, 53, 58, 61, 64                                                                   |

| <i>N</i> <sub>0</sub> | Schlegel Diagram of<br><i>C</i> <sub>70</sub> (CF <sub>3</sub> ) <sub>18</sub>      | $\Delta_f H_0^\circ$<br>kJ mol <sup>-1</sup> |      | IUPAC lowest-locant abbreviation for<br>octadeca(trifluoromethyl)( <i>C</i> <sub>70</sub> - <i>D</i> <sub>5h(6)</sub> )[5,6]fullerene |
|-----------------------|-------------------------------------------------------------------------------------|----------------------------------------------|------|---------------------------------------------------------------------------------------------------------------------------------------|
|                       |                                                                                     | DFT                                          | AMI  |                                                                                                                                       |
| 16                    | 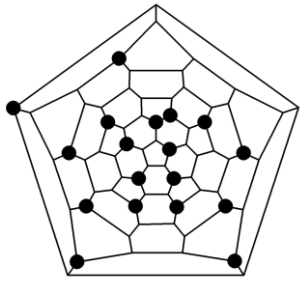   | 31.6                                         | 31.7 | 1, 4, 8, 11, 16, 19, 23, 26, 31, 33, 37, 41, 48, 53, 55, 60, 67, 69                                                                   |
| 17                    |   | 32.0                                         | 27.7 | 1, 4, 8, 11, 19, 23, 26, 31, 34, 41, 45, 48, 52, 55, 60, 63, 67, 69                                                                   |
| 18                    |  | 33.7                                         | 34.2 | 1, 4, 8, 11, 16, 19, 23, 27, 31, 33, 41, 44, 46, 51, 53, 56, 62, 64                                                                   |
| 19                    |  | 33.7                                         | 20.0 | 1, 4, 8, 11, 16, 19, 23, 24, 27, 31, 37, 41, 44, 47, 55, 60, 67, 69                                                                   |

| <i>N</i> <sub>0</sub> | Schlegel Diagram of<br><i>C</i> <sub>70</sub> ( <i>CF</i> <sub>3</sub> ) <sub>18</sub> | $\Delta_f H_0^0$<br>kJ mol <sup>-1</sup> |      | IUPAC lowest-locant abbreviation for<br>octadeca(trifluoromethyl)( <i>C</i> <sub>70</sub> - <i>D</i> <sub>5h(6)</sub> )[5,6]fullerene |
|-----------------------|----------------------------------------------------------------------------------------|------------------------------------------|------|---------------------------------------------------------------------------------------------------------------------------------------|
|                       |                                                                                        | DFT                                      | AMI  |                                                                                                                                       |
| 20                    | 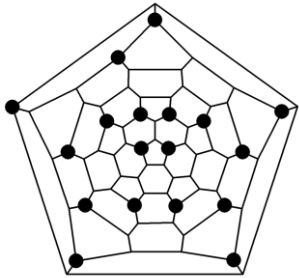      | 36.7                                     | 29.1 | 1, 4, 8, 11, 18, 23, 27, 31, 35, 38, 42, 45, 47, 51, 55, 58, 61, 64                                                                   |
| 21                    |      | 36.7                                     | 13.9 | 1, 4, 8, 11, 16, 19, 23, 27, 31, 34, 37, 41, 47, 52, 55, 60, 67, 69                                                                   |
| 22                    |     | 36.9                                     | 32.7 | 1, 4, 8, 11, 16, 19, 23, 27, 31, 33, 37, 41, 44, 46, 51, 56, 62, 64                                                                   |

**Table 2.** The Schlegel diagrams, relative energies (at the DFT and AM1 levels of theory), and IUPAC lowest-locant abbreviations for the most stable isomers of  $C_{70}(CF_3)_{20}$  within the gap of 40  $\text{kJ mol}^{-1}$  (the fields with experimentally observed isomers are shadowed).

| $N\bar{2}$ | Schlegel Diagram of $C_{70}(CF_3)_{20}$                                             | $\Delta_f H_0^o$<br>$\text{kJ mol}^{-1}$ |      | IUPAC lowest-locant abbreviation for<br><i>icosa(trifluoromethyl)(<math>C_{70}</math>-<math>D_{5h(6)}</math>)[5,6]fullerene</i> |
|------------|-------------------------------------------------------------------------------------|------------------------------------------|------|---------------------------------------------------------------------------------------------------------------------------------|
|            |                                                                                     | DFT                                      | AMI  |                                                                                                                                 |
| 1          | 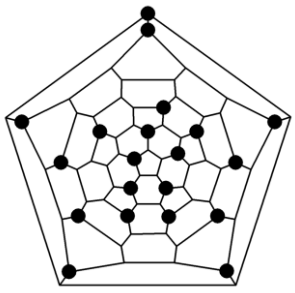   | 0.0                                      | 14.9 | 1, 4, 8, 11, 16, 19, 23, 24, 27, 31, 33, 37, 44, 47, 51, 53, 55, 58, 61, 64                                                     |
| 2          |   | 8.4                                      | 33.4 | 1, 4, 8, 11, 16, 19, 23, 27, 31, 33, 37, 41, 44, 45, 47, 51, 53, 55, 56, 64                                                     |
| 3          |  | 8.6                                      | 50.5 | 1, 4, 8, 11, 16, 19, 23, 26, 31, 33, 37, 41, 44, 47, 48, 53, 54, 56, 60, 69                                                     |
| 4          |  | 9.5                                      | 42.4 | 1, 4, 8, 11, 16, 19, 23, 26, 31, 34, 37, 41, 44, 47, 48, 52, 53, 56, 60, 69                                                     |

| <i>N<sub>0</sub></i> | Schlegel Diagram of<br><i>C<sub>70</sub>(CF<sub>3</sub>)<sub>20</sub></i>           | $\Delta_f H_0^0$<br>kJ mol <sup>-1</sup> |      | IUPAC lowest-locant abbreviation for<br><i>icosa(trifluoromethyl)(C<sub>70</sub>-D<sub>5h(6)</sub>)[5,6]fullerene</i> |
|----------------------|-------------------------------------------------------------------------------------|------------------------------------------|------|-----------------------------------------------------------------------------------------------------------------------|
|                      |                                                                                     | DFT                                      | AMI  |                                                                                                                       |
| 5                    | 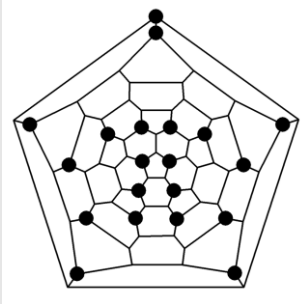   | 10.2                                     | 0.0  | 1, 4, 8, 11, 16, 19, 23, 27, 31, 34, 37, 41, 44, 46, 47, 52, 55, 60, 67, 69                                           |
| 6                    |   | 10.4                                     | 30.4 | 1, 4, 8, 11, 16, 19, 23, 26, 31, 34, 37, 41, 45, 48, 52, 55, 60, 63, 67, 69                                           |
| 7                    |  | 18.0                                     | 24.4 | 1, 4, 8, 11, 16, 19, 23, 26, 31, 34, 37, 41, 44, 47, 48, 52, 55, 60, 67, 69                                           |
| 8                    |  | 18.8                                     | 23.5 | 1, 4, 8, 11, 16, 19, 23, 27, 31, 33, 37, 41, 44, 46, 47, 53, 55, 60, 67, 69                                           |



| <i>N</i> <sub>0</sub> | Schlegel Diagram of<br><i>C</i> <sub>70</sub> ( <i>CF</i> <sub>3</sub> ) <sub>20</sub> | $\Delta_f H_0^{\circ}$<br>kJ mol <sup>-1</sup> |      | IUPAC lowest-locant abbreviation for<br>icosa(trifluoromethyl)( <i>C</i> <sub>70</sub> - <i>D</i> <sub>5h(6)</sub> )[5,6]fullerene |
|-----------------------|----------------------------------------------------------------------------------------|------------------------------------------------|------|------------------------------------------------------------------------------------------------------------------------------------|
|                       |                                                                                        | DFT                                            | AMI  |                                                                                                                                    |
| 9                     | 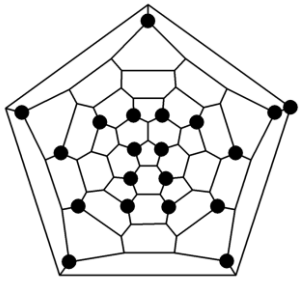      | 24.7                                           | 23.7 | 1, 4, 8, 11, 16, 19, 23, 26, 27, 31, 34, 37, 41, 44, 47, 52, 55, 60, 67, 69                                                        |
| 10                    |      | 25.1                                           | 41.6 | 1, 4, 8, 11, 16, 19, 23, 26, 31, 33, 37, 41, 45, 48, 53, 55, 60, 63, 67, 69                                                        |
| 11                    |     | 27.1                                           | 48.6 | 1, 4, 8, 11, 16, 19, 23, 26, 31, 33, 37, 41, 44, 47, 48, 53, 55, 60, 67, 69                                                        |
| 12                    |     | 31.6                                           | 50.4 | 1, 4, 8, 11, 16, 19, 23, 26, 27, 31, 33, 37, 41, 44, 47, 53, 54, 56, 60, 69                                                        |

| <i>N<sub>0</sub></i> | <i>Schlegel Diagram of C<sub>70</sub>(CF<sub>3</sub>)<sub>20</sub></i>              | $\Delta_f H_0^0$<br>kJ mol <sup>-1</sup> |            | <i>IUPAC lowest-locant abbreviation for icos(trifluoromethyl)(C<sub>70</sub>-D<sub>5h(6)</sub>)[5,6]fullerene</i> |
|----------------------|-------------------------------------------------------------------------------------|------------------------------------------|------------|-------------------------------------------------------------------------------------------------------------------|
|                      |                                                                                     | <i>DFT</i>                               | <i>AMI</i> |                                                                                                                   |
| 13                   | 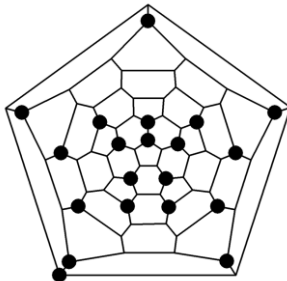   | 32.0                                     | 49.4       | 1, 4, 8, 11, 16, 19, 23, 24, 27, 31, 33, 37, 41, 44, 47, 53, 54, 56, 60, 69                                       |
| 14                   |   | 32.2                                     | 48.5       | 1, 4, 8, 11, 16, 19, 23, 26, 27, 31, 34, 37, 41, 44, 47, 52, 53, 56, 60, 69                                       |
| 15                   |  | 33.2                                     | 48.5       | 1, 4, 8, 11, 16, 19, 23, 24, 27, 31, 34, 37, 41, 44, 47, 52, 53, 56, 60, 69                                       |
| 16                   |  | 37.3                                     | 28.0       | 1, 4, 8, 11, 16, 19, 23, 24, 27, 31, 34, 37, 41, 44, 47, 52, 55, 60, 67, 69                                       |

| <i>N<sub>0</sub></i> | <i>Schlegel Diagram of C<sub>70</sub>(CF<sub>3</sub>)<sub>20</sub></i>            | $\Delta_f H_0^0$<br>kJ mol <sup>-1</sup> |            | <i>IUPAC lowest-locant abbreviation for icoso(trifluoromethyl)(C<sub>70</sub>-D<sub>5h(6)</sub>)[5,6]fullerene</i> |
|----------------------|-----------------------------------------------------------------------------------|------------------------------------------|------------|--------------------------------------------------------------------------------------------------------------------|
|                      |                                                                                   | <i>DFT</i>                               | <i>AMI</i> |                                                                                                                    |
| 17                   | 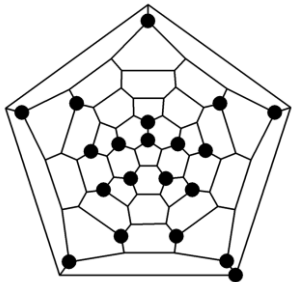 | 40.6                                     | 48.0       | 1, 4, 8, 11, 16, 19, 23, 25, 27, 31, 33, 37, 41, 44, 47, 51, 53, 55, 56, 64                                        |
